# Supplementary material
Source: HighWire-hosted journal article supplement (https://jnm.snmjournals.org/highwire/filestream/103988/field_highwire_adjunct_files/0/261915_Supplemental_Data.pdf)

Supplemental Figure 1. Flowchart of the study

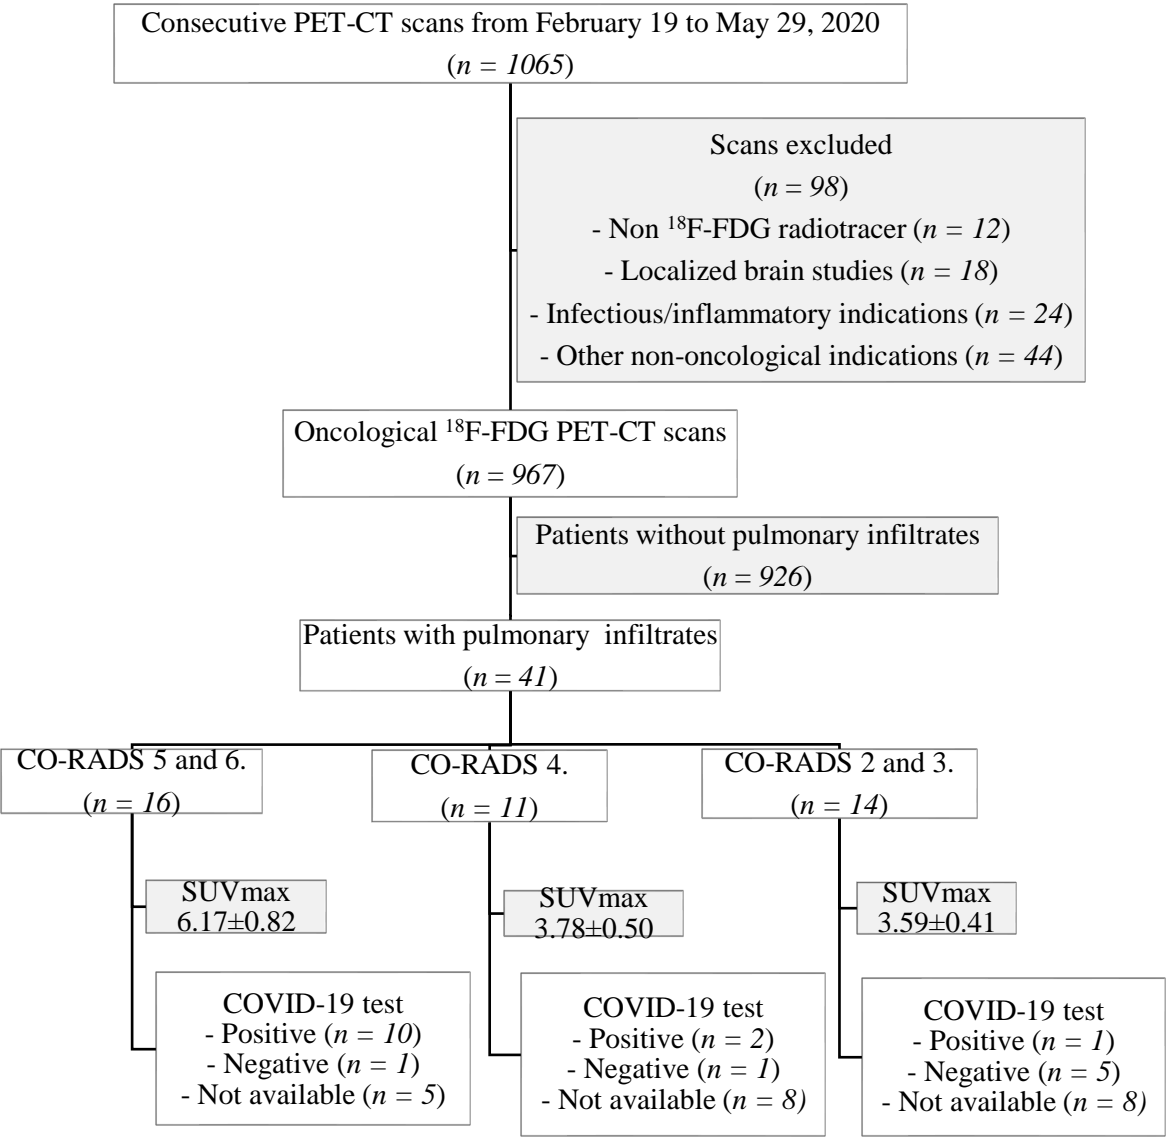

Supplement: 261915_Supplemental_Data.pdf [file 261915_Supplemental_Data.pdf]
